# Supplementary material for: Education differences in cardiometabolic risk in England, Scotland and the United States between 1992 and 2019
Source: PubMed Central journal article supplement (PMC9161563; doi:10.1186/s12872-022-02681-y), 2022-06-02
Supplement: 12872_2022_2681_MOESM1_ESM.pdf [file 12872_2022_2681_MOESM1_ESM.pdf]

# Education differences in cardiometabolic risk in England, Scotland and the United States between 1992 and 2019

Supplementary file

## 1 Variable harmonisation

**Table 1:** Harmonised and original variables by survey and year. Antihypertensive medications in NHANES in 1994 includes 14 variables starting with `hax9dg`. In HSE 1992, antihypertensive medications were identified from 10 variables coding for up to 10 medications. Calculation of diastolic and systolic blood pressure in NHANES 2000-2018 was based on the single measurements recorded in the variables starting with `bpxdi` and `bpxsy`. Blood pressure measurements in SHS between 2003-2019 were calculated with the variables starting with `dias` and `sys`.

| Year | Harmonised variable  | NHANES | HSE         | SHS |
|------|----------------------|--------|-------------|-----|
| 1992 | age                  |        | age         |     |
| 1992 | antihypertensives    |        | medications |     |
| 1992 | antihypertensives    |        |             |     |
| 1992 | antihypertensives    |        |             |     |
| 1992 | antihypertensives    |        |             |     |
| 1992 | cholesterol          |        | cholest     |     |
| 1992 | diastolic            |        | diastolic   |     |
| 1992 | height               |        | height      |     |
| 1992 | sex                  |        | sex         |     |
| 1992 | smoking              |        | ciggrp      |     |
| 1992 | strata               |        | rhaarea     |     |
| 1992 | systolic             |        | systolic    |     |
| 1992 | weight               |        | weight      |     |
| 1993 | age                  |        | age         |     |
| 1993 | antihypertensives    |        | diur        |     |
| 1993 | antihypertensives    |        | beta        |     |
| 1993 | antihypertensives    |        | ace         |     |
| 1993 | antihypertensives    |        | calc        |     |
| 1993 | cholesterol          |        | cholest     |     |
| 1993 | diastolic            |        | newdiast    |     |
| 1993 | glycated haemoglobin |        | glyco       |     |
| 1993 | height               |        | height      |     |
| 1993 | sex                  |        | sex         |     |
| 1993 | smoking              |        | ciggrp      |     |
| 1993 | strata               |        | rha14       |     |

Continues on the next page ... . . .

| Year | Harmonised variable  | NHANES   | HSE      | SHS      |
|------|----------------------|----------|----------|----------|
| 1993 | systolic             |          | newsyst  |          |
| 1993 | weight               |          | weight   |          |
| 1994 | age                  | hsageir  | age      |          |
| 1994 | antihypertensives    | hax9dg   | cvdmed01 |          |
| 1994 | antihypertensives    |          | cvdmed02 |          |
| 1994 | antihypertensives    |          | cvdmed04 |          |
| 1994 | antihypertensives    |          | cvdmed07 |          |
| 1994 | cholesterol          | tcpsi    |          |          |
| 1994 | cholesterol          |          | cholest  |          |
| 1994 | diastolic            | pepmnk5r | newdiast |          |
| 1994 | glycated haemoglobin | ghp      |          |          |
| 1994 | height               | bmpht    | height   |          |
| 1994 | sex                  | hssex    | sex      |          |
| 1994 | smoking              | har3     | smokenow |          |
| 1994 | strata               | sdpstra6 | gor      |          |
| 1994 | systolic             | pepmnk1r | newsyst  |          |
| 1994 | weight               | bmpwt    | weight   |          |
| 1995 | age                  |          | age      | respage  |
| 1995 | antihypertensives    |          | diur     | cvdmed01 |
| 1995 | antihypertensives    |          | beta     | beta     |
| 1995 | antihypertensives    |          | aceinh   | aceinh   |
| 1995 | antihypertensives    |          | calciumb | calciumb |
| 1995 | cholesterol          |          |          | cholv    |
| 1995 | diastolic            |          | newdiast | diastol  |
| 1995 | height               |          | height   | height   |
| 1995 | sex                  |          | sex      | respsex  |
| 1995 | smoking              |          | smokenow | smokenow |
| 1995 | strata               |          | gor      | strata   |
| 1995 | systolic             |          | newsyst  | systol   |
| 1995 | weight               |          | weight   | weight   |
| 1996 | age                  |          | age      |          |
| 1996 | antihypertensives    |          | diur     |          |
| 1996 | antihypertensives    |          | beta     |          |
| 1996 | antihypertensives    |          | aceinh   |          |
| 1996 | antihypertensives    |          | calciumb |          |
| 1996 | diastolic            |          | newdiast |          |
| 1996 | height               |          | height   |          |
| 1996 | sex                  |          | sex      |          |
| 1996 | smoking              |          | smokenow |          |
| 1996 | strata               |          | gor      |          |
| 1996 | systolic             |          | newsyst  |          |
| 1996 | weight               |          | weight   |          |
| 1997 | age                  |          | age      |          |
| 1997 | antihypertensives    |          | diur     |          |
| 1997 | antihypertensives    |          | beta     |          |
| 1997 | antihypertensives    |          | aceinh   |          |
| 1997 | antihypertensives    |          | calciumb |          |
| 1997 | diastolic            |          | newdiast |          |
| 1997 | height               |          | height   |          |

Continues on the next page ... .

| Year | Harmonised variable  | NHANES   | HSE      | SHS      |
|------|----------------------|----------|----------|----------|
| 1997 | sex                  |          | sex      |          |
| 1997 | smoking              |          | cignow   |          |
| 1997 | strata               |          | gor      |          |
| 1997 | systolic             |          | sysval   |          |
| 1997 | weight               |          | weight   |          |
| 1998 | age                  |          | age      | age      |
| 1998 | antihypertensives    |          | diur     | diur     |
| 1998 | antihypertensives    |          | beta     | beta     |
| 1998 | antihypertensives    |          | aceinh   | aceinh   |
| 1998 | antihypertensives    |          | calciumb | calciumb |
| 1998 | cholesterol          |          | cholval  |          |
| 1998 | cholesterol          |          |          | cholval  |
| 1998 | diastolic            |          | newdiast | diaval   |
| 1998 | height               |          | height   | height   |
| 1998 | sex                  |          | sex      | sex      |
| 1998 | smoking              |          | cignow   | smokenow |
| 1998 | strata               |          | gor      | region   |
| 1998 | systolic             |          | sysval   | sysval   |
| 1998 | weight               |          | weight   | weight   |
| 1999 | age                  |          | age      |          |
| 1999 | antihypertensives    |          | diur     |          |
| 1999 | antihypertensives    |          | beta     |          |
| 1999 | antihypertensives    |          | aceinh   |          |
| 1999 | antihypertensives    |          | calciumb |          |
| 1999 | cholesterol          |          | cholval  |          |
| 1999 | diastolic            |          | newdiast |          |
| 1999 | height               |          | height   |          |
| 1999 | sex                  |          | sex      |          |
| 1999 | smoking              |          | cignow   |          |
| 1999 | strata               |          | gor      |          |
| 1999 | systolic             |          | sysval   |          |
| 1999 | weight               |          | weight   |          |
| 2000 | age                  | ridageyr | age      |          |
| 2000 | antihypertensives    | rxddci1b | diur     |          |
| 2000 | antihypertensives    | rxddci1b | beta     |          |
| 2000 | antihypertensives    | rxddci1b | aceinh   |          |
| 2000 | antihypertensives    | rxddci1b | calciumb |          |
| 2000 | cholesterol          | lbdcsi   |          |          |
| 2000 | diastolic            | bpxdi    | newdiast |          |
| 2000 | glycated haemoglobin | lboxgh   |          |          |
| 2000 | height               | bmxt     | height   |          |
| 2000 | sex                  | riagendr | sex      |          |
| 2000 | smoking              | smq040   | cignow   |          |
| 2000 | strata               | sdmvstra | gor      |          |
| 2000 | systolic             | bpxsy    | sysval   |          |
| 2000 | weight               | bmxt     | weight   |          |
| 2001 | age                  |          | age      |          |
| 2001 | antihypertensives    |          | diur     |          |
| 2001 | antihypertensives    |          | beta     |          |

Continues on the next page ... .

| Year | Harmonised variable  | NHANES   | HSE      | SHS      |
|------|----------------------|----------|----------|----------|
| 2001 | antihypertensives    |          | aceinh   |          |
| 2001 | antihypertensives    |          | calciumb |          |
| 2001 | diastolic            |          | newdiast |          |
| 2001 | height               |          | height   |          |
| 2001 | sex                  |          | sex      |          |
| 2001 | smoking              |          | cignow   |          |
| 2001 | strata               |          | gora     |          |
| 2001 | systolic             |          | sysval   |          |
| 2001 | weight               |          | weight   |          |
| 2002 | age                  | ridageyr | age      |          |
| 2002 | antihypertensives    | rxddci1b | diur     |          |
| 2002 | antihypertensives    | rxddci1b | beta     |          |
| 2002 | antihypertensives    | rxddci1b | aceinh   |          |
| 2002 | antihypertensives    | rxddci1b | calciumb |          |
| 2002 | cholesterol          | lbdtcsi  |          |          |
| 2002 | diastolic            | bpxdi    | newdiast |          |
| 2002 | glycated haemoglobin | lbxgh    |          |          |
| 2002 | height               | bmxt     | height   |          |
| 2002 | sex                  | riagendr | sex      |          |
| 2002 | smoking              | smq040   | cignow   |          |
| 2002 | strata               | sdmvstra | gor      |          |
| 2002 | systolic             | bpxsy    | sysval   |          |
| 2002 | weight               | bmxt     | weight   |          |
| 2003 | age                  |          | age      | age      |
| 2003 | antihypertensives    |          | diur     | diur     |
| 2003 | antihypertensives    |          | beta     | beta     |
| 2003 | antihypertensives    |          | aceinh   | aceinh   |
| 2003 | antihypertensives    |          | calciumb | calciumb |
| 2003 | cholesterol          |          | cholval  |          |
| 2003 | cholesterol          |          |          | cholval  |
| 2003 | diastolic            |          | omdiaval | dias     |
| 2003 | glycated haemoglobin |          | glyhbval |          |
| 2003 | glycated haemoglobin |          |          | glyhb    |
| 2003 | height               |          | height   | height   |
| 2003 | sex                  |          | sex      | sex      |
| 2003 | smoking              |          | cignow   | smokenow |
| 2003 | strata               |          | gor      | strata   |
| 2003 | systolic             |          | omsysval | sys      |
| 2003 | weight               |          | weight   | weight   |
| 2004 | age                  | ridageyr | age      |          |
| 2004 | antihypertensives    | rxddci1b | diur     |          |
| 2004 | antihypertensives    | rxddci1b | beta     |          |
| 2004 | antihypertensives    | rxddci1b | aceinh   |          |
| 2004 | antihypertensives    | rxddci1b | calciumb |          |
| 2004 | cholesterol          | lbdtcsi  |          |          |
| 2004 | cholesterol          |          | cholval  |          |
| 2004 | diastolic            | bpxdi    | omdiaval |          |
| 2004 | glycated haemoglobin | lbxgh    |          |          |
| 2004 | glycated haemoglobin |          | glyhbval |          |

Continues on the next page ... .

| <b>Year</b> | <b>Harmonised variable</b> | <b>NHANES</b> | <b>HSE</b> | <b>SHS</b> |
|-------------|----------------------------|---------------|------------|------------|
| 2004        | height                     | bmxht         | height     |            |
| 2004        | sex                        | riagendr      | sex        |            |
| 2004        | smoking                    | smq040        | cignow     |            |
| 2004        | strata                     | sdmvstra      | gor        |            |
| 2004        | systolic                   | bpxsy         | omsysval   |            |
| 2004        | weight                     | bmxwt         | weight     |            |
| 2005        | age                        |               | age        |            |
| 2005        | antihypertensives          |               | diur       |            |
| 2005        | antihypertensives          |               | beta       |            |
| 2005        | antihypertensives          |               | aceinh     |            |
| 2005        | antihypertensives          |               | calciumb   |            |
| 2005        | diastolic                  |               | omdiaval   |            |
| 2005        | height                     |               | height     |            |
| 2005        | sex                        |               | sex        |            |
| 2005        | smoking                    |               | cignow     |            |
| 2005        | strata                     |               | gor        |            |
| 2005        | systolic                   |               | omsysval   |            |
| 2005        | weight                     |               | weight     |            |
| 2006        | age                        | ridageyr      | age        |            |
| 2006        | antihypertensives          | rxddci1b      | diur       |            |
| 2006        | antihypertensives          | rxddci1b      | beta       |            |
| 2006        | antihypertensives          | rxddci1b      | aceinh     |            |
| 2006        | antihypertensives          | rxddci1b      | calciumb   |            |
| 2006        | cholesterol                | lbdtcsi       |            |            |
| 2006        | cholesterol                |               | cholval    |            |
| 2006        | diastolic                  | bpxdi         | omdiaval   |            |
| 2006        | glycated haemoglobin       | lbxgh         |            |            |
| 2006        | glycated haemoglobin       |               | glyhbval   |            |
| 2006        | height                     | bmxht         | height     |            |
| 2006        | sex                        | riagendr      | sex        |            |
| 2006        | smoking                    | smq040        | cignow     |            |
| 2006        | strata                     | sdmvstra      | gor06      |            |
| 2006        | systolic                   | bpxsy         | omsysval   |            |
| 2006        | weight                     | bmxwt         | weight     |            |
| 2007        | age                        |               | age        |            |
| 2007        | antihypertensives          |               | diur       |            |
| 2007        | antihypertensives          |               | beta       |            |
| 2007        | antihypertensives          |               | aceinh     |            |
| 2007        | antihypertensives          |               | calciumb   |            |
| 2007        | diastolic                  |               | omdiaval   |            |
| 2007        | height                     |               | height     |            |
| 2007        | sex                        |               | sex        |            |
| 2007        | smoking                    |               | cignow     |            |
| 2007        | strata                     |               | gor7       |            |
| 2007        | systolic                   |               | omsysval   |            |
| 2007        | weight                     |               | weight     |            |
| 2008        | age                        | ridageyr      | age        | age        |
| 2008        | antihypertensives          | rxddci1b      | diur       | diur       |
| 2008        | antihypertensives          | rxddci1b      | beta       | beta       |

Continues on the next page ... .

| Year | Harmonised variable  | NHANES   | HSE      | SHS      |
|------|----------------------|----------|----------|----------|
| 2008 | antihypertensives    | rxddci1b | aceinh   | aceinh   |
| 2008 | antihypertensives    | rxddci1b | calciumb | calciumb |
| 2008 | cholesterol          | lbdtsi   |          |          |
| 2008 | cholesterol          |          | cholval  |          |
| 2008 | cholesterol          |          |          | cholval  |
| 2008 | diastolic            | bpxdi    | omdiaval | dias     |
| 2008 | glycated haemoglobin | lbxgh    |          |          |
| 2008 | glycated haemoglobin |          | glyhbval |          |
| 2008 | glycated haemoglobin |          |          | glyhb    |
| 2008 | height               | bmght    | height   | height   |
| 2008 | sex                  | riagendr | sex      | sex      |
| 2008 | smoking              | smq040   | cignow   | smokenow |
| 2008 | strata               | sdmvstra | gor      | strata   |
| 2008 | systolic             | bpxsy    | omsysval | sys      |
| 2008 | weight               | bmwxt    | weight   | weight   |
| 2009 | age                  |          | age      | age      |
| 2009 | antihypertensives    |          | diur     | diur     |
| 2009 | antihypertensives    |          | beta     | beta     |
| 2009 | antihypertensives    |          | aceinh   | aceinh   |
| 2009 | antihypertensives    |          | calciumb | calciumb |
| 2009 | cholesterol          |          | cholval  |          |
| 2009 | cholesterol          |          |          | cholval  |
| 2009 | cholesterol          |          |          | dias     |
| 2009 | diastolic            |          | omdiaval |          |
| 2009 | glycated haemoglobin |          | glyhbval |          |
| 2009 | glycated haemoglobin |          |          | glyhb    |
| 2009 | height               |          | height   | height   |
| 2009 | sex                  |          | sex      | sex      |
| 2009 | smoking              |          | cignow   | smokenow |
| 2009 | strata               |          | gor07    | strata   |
| 2009 | systolic             |          | omsysval | sys      |
| 2009 | weight               |          | weight   | weight   |
| 2010 | age                  | ridageyr | age      | age      |
| 2010 | antihypertensives    | rxddci1b | diur     | diur     |
| 2010 | antihypertensives    | rxddci1b | beta     | beta     |
| 2010 | antihypertensives    | rxddci1b | aceinh   | aceinh   |
| 2010 | antihypertensives    | rxddci1b | calciumb | calciumb |
| 2010 | cholesterol          | lbdtsi   |          |          |
| 2010 | cholesterol          |          | cholval  |          |
| 2010 | cholesterol          |          |          | cholval  |
| 2010 | cholesterol          |          |          | dias     |
| 2010 | diastolic            | bpxdi    | omdiaval |          |
| 2010 | glycated haemoglobin | lbxgh    |          |          |
| 2010 | glycated haemoglobin |          | glyhbval |          |
| 2010 | glycated haemoglobin |          |          | glyhb    |
| 2010 | height               | bmght    | height   | height   |
| 2010 | sex                  | riagendr | sex      | sex      |
| 2010 | smoking              | smq040   | cignow   | smokenow |
| 2010 | strata               | sdmvstra | gor1     | strata   |
| 2010 | systolic             | bpxsy    | omsysval | sys      |
| 2010 | weight               | bmwxt    | weight   | weight   |

Continues on the next page ... .

| Year | Harmonised variable  | NHANES   | HSE        | SHS      |
|------|----------------------|----------|------------|----------|
| 2011 | age                  |          | age        | age      |
| 2011 | antihypertensives    |          | diur       | diur     |
| 2011 | antihypertensives    |          | beta       | beta     |
| 2011 | antihypertensives    |          | aceinh     | aceinh   |
| 2011 | antihypertensives    |          | calciumb   | calciumb |
| 2011 | cholesterol          |          | cholvalold |          |
| 2011 | cholesterol          |          |            | cholval  |
| 2011 | diastolic            |          | omdiaval   | dias     |
| 2011 | glycated haemoglobin |          | glyhbval   |          |
| 2011 | glycated haemoglobin |          |            | glyhb    |
| 2011 | height               |          | height     | height   |
| 2011 | sex                  |          | sex        | sex      |
| 2011 | smoking              |          | cignow     | smokenow |
| 2011 | strata               |          | gor1       | strata   |
| 2011 | systolic             |          | omsysval   | sys      |
| 2011 | weight               |          | weight     | weight   |
| 2012 | age                  | ridageyr | age        |          |
| 2012 | antihypertensives    | rxddci1b | diur2      |          |
| 2012 | antihypertensives    | rxddci1b | beta2      |          |
| 2012 | antihypertensives    | rxddci1b | aceinh2    |          |
| 2012 | antihypertensives    | rxddci1b | calciumb2  |          |
| 2012 | cholesterol          | lbdtcsi  |            |          |
| 2012 | cholesterol          |          | cholval12  |          |
| 2012 | diastolic            | bpxdi    | omdiaval   |          |
| 2012 | glycated haemoglobin | lbxgh    |            |          |
| 2012 | glycated haemoglobin |          | glyhbval   |          |
| 2012 | height               | bmxt     | height     |          |
| 2012 | sex                  | riagendr | sex        |          |
| 2012 | smoking              | smq040   | cignow     |          |
| 2012 | strata               | sdmvstra | gor1       |          |
| 2012 | systolic             | bpxsy    | omsysval   |          |
| 2012 | weight               | bmxt     | weight     |          |
| 2013 | age                  |          | age        | age      |
| 2013 | antihypertensives    |          | diur2      | diur     |
| 2013 | antihypertensives    |          | beta2      | beta     |
| 2013 | antihypertensives    |          | aceinh2    | aceinh   |
| 2013 | antihypertensives    |          | calciumb2  | calciumb |
| 2013 | cholesterol          |          | cholval12  |          |
| 2013 | diastolic            |          | omdiaval   | dias     |
| 2013 | glycated haemoglobin |          | glyhbval   |          |
| 2013 | height               |          | height     | height   |
| 2013 | sex                  |          | sex        | sex      |
| 2013 | smoking              |          | cignow     | smokenow |
| 2013 | strata               |          | gor1       | strata   |
| 2013 | systolic             |          | omsysval   | sys      |
| 2013 | weight               |          | weight     | weight   |
| 2014 | age                  | ridageyr | age        | age      |
| 2014 | antihypertensives    | rxddci1b | diur2      | diur     |
| 2014 | antihypertensives    | rxddci1b | beta2      | beta     |

Continues on the next page ... .

| <b>Year</b> | <b>Harmonised variable</b> | <b>NHANES</b> | <b>HSE</b> | <b>SHS</b> |
|-------------|----------------------------|---------------|------------|------------|
| 2014        | antihypertensives          | rxddci1b      | aceinh2    | aceinh     |
| 2014        | antihypertensives          | rxddci1b      | calciumb2  | calciumb   |
| 2014        | cholesterol                | lbdtsi        |            |            |
| 2014        | cholesterol                |               | cholval12  |            |
| 2014        | diastolic                  | bpxdi         | omdiaval   | dias       |
| 2014        | glycated haemoglobin       | lbxgh         |            |            |
| 2014        | glycated haemoglobin       |               | glyhbval   |            |
| 2014        | height                     | bmght         | height     | height     |
| 2014        | sex                        | riagendr      | sex        | sex        |
| 2014        | smoking                    | smq040        | cignow     | smokenow   |
| 2014        | strata                     | sdmvstra      | gor1       | strata     |
| 2014        | systolic                   | bpxsy         | omsysval   | sys        |
| 2014        | weight                     | bmght         | weight     | weight     |
| 2015        | age                        |               | age        | age        |
| 2015        | antihypertensives          |               | diur2      | diur       |
| 2015        | antihypertensives          |               | beta2      | beta       |
| 2015        | antihypertensives          |               | aceinh2    | aceinh     |
| 2015        | antihypertensives          |               | calciumb2  | calciumb   |
| 2015        | cholesterol                |               | cholval1a  |            |
| 2015        | diastolic                  |               | omdiaval   | dias       |
| 2015        | glycated haemoglobin       |               | glyhbvala  |            |
| 2015        | height                     |               | height     | height     |
| 2015        | sex                        |               | sex        | sex        |
| 2015        | smoking                    |               | cignow     | smokenow   |
| 2015        | strata                     |               | gor1       | strata     |
| 2015        | systolic                   |               | omsysval   | sys        |
| 2015        | weight                     |               | weight     | weight     |
| 2016        | age                        | ridageyr      | age        | age        |
| 2016        | antihypertensives          | rxddci1b      | diur2      | diur       |
| 2016        | antihypertensives          | rxddci1b      | beta2      | beta       |
| 2016        | antihypertensives          | rxddci1b      | aceinh2    | aceinh     |
| 2016        | antihypertensives          | rxddci1b      | calciumb2  | calciumb   |
| 2016        | cholesterol                | lbdtsi        |            |            |
| 2016        | cholesterol                |               | cholval1a  |            |
| 2016        | diastolic                  | bpxdi         | omdiaval   | dias       |
| 2016        | glycated haemoglobin       | lbxgh         |            |            |
| 2016        | glycated haemoglobin       |               | glyhbvala  |            |
| 2016        | height                     | bmght         | height     | height     |
| 2016        | sex                        | riagendr      | sex        | sex        |
| 2016        | smoking                    | smq040        | cignow     | smokenow   |
| 2016        | strata                     | sdmvstra      | gor1       | strata     |
| 2016        | systolic                   | bpxsy         | omsysval   | sys        |
| 2016        | weight                     | bmght         | weight     | weight     |
| 2017        | age                        |               | age        | age        |
| 2017        | antihypertensives          |               | diur2      | diur       |
| 2017        | antihypertensives          |               | beta2      | beta       |
| 2017        | antihypertensives          |               | aceinh2    | aceinh     |
| 2017        | antihypertensives          |               | calciumb2  | calciumb   |
| 2017        | cholesterol                |               | cholval1a  |            |

Continues on the next page ... .



| <b>Year</b> | <b>Harmonised variable</b> | <b>NHANES</b> | <b>HSE</b> | <b>SHS</b> |
|-------------|----------------------------|---------------|------------|------------|
| 2017        | diastolic                  |               | omdiaval   | dias       |
| 2017        | glycated haemoglobin       |               | glyhbvala  |            |
| 2017        | height                     |               | height     | height     |
| 2017        | sex                        |               | sex        | sex        |
| 2017        | smoking                    |               | cignow     | smokenow   |
| 2017        | strata                     |               | gor1       | strata     |
| 2017        | systolic                   |               | omsysval   | sys        |
| 2017        | weight                     |               | weight     | weight     |
| 2018        | age                        | ridageyr      | age        | age        |
| 2018        | antihypertensives          | rxddci1b      | diur2      | diur       |
| 2018        | antihypertensives          | rxddci1b      | beta2      | beta       |
| 2018        | antihypertensives          | rxddci1b      | aceinh2    | aceinh     |
| 2018        | antihypertensives          | rxddci1b      | calciumb2  | calciumb   |
| 2018        | cholesterol                | lbdtcsi       |            |            |
| 2018        | cholesterol                |               | cholval1a  |            |
| 2018        | diastolic                  | bpxdi         | omdiaval   | dias       |
| 2018        | glycated haemoglobin       | lbxgh         |            |            |
| 2018        | glycated haemoglobin       |               | glyhbvala  |            |
| 2018        | height                     | bmght         | height     | height     |
| 2018        | sex                        | riagendr      | sex        | sex        |
| 2018        | smoking                    | smq040        | cignow     | smokenow   |
| 2018        | strata                     | sdmvstra      | gor1       | strata     |
| 2018        | systolic                   | bpxsy         | omsysval   | sys        |
| 2018        | weight                     | bmght         | weight     | weight     |
| 2019        | age                        |               | age        | age        |
| 2019        | antihypertensives          |               | diur2      | diur       |
| 2019        | antihypertensives          |               | beta2      | beta       |
| 2019        | antihypertensives          |               | aceinh2    | aceinh     |
| 2019        | antihypertensives          |               | calciumb2  | calciumb   |
| 2019        | cholesterol                |               | cholval1a  |            |
| 2019        | diastolic                  |               | omdiaval   | dias       |
| 2019        | glycated haemoglobin       |               | glyhbvala  |            |
| 2019        | height                     |               | height     | height     |
| 2019        | sex                        |               | sex        | sex        |
| 2019        | smoking                    |               | cignow     | smokenow   |
| 2019        | strata                     |               | gor1       | strata     |
| 2019        | systolic                   |               | omsysval   | sys        |
| 2019        | weight                     |               | weight     | weight     |

## 2 Regression tables

**Table 2a:** Linear mixed regression models by survey. Coefficients  $\beta$  and 99% confidence intervals.  $m$  and  $n$ : number of random-effect strata levels and sample size, respectively.  $\sigma$ : standard deviation of the random intercepts and residuals. SBP, DBP: systolic and diastolic blood pressure. BMI: body-mass-index

| Variable                          | SBP                        | DBP                     | BMI                     |
|-----------------------------------|----------------------------|-------------------------|-------------------------|
| <b>NAHNES</b>                     |                            |                         |                         |
| Intercept                         | 112.891 [112.120; 113.662] | 70.438 [69.812; 71.065] | 24.136 [23.853; 24.419] |
| Degree (ref. other qualification) | -2.903 [-3.596; -2.210]    | -0.609 [-1.042; -0.175] | -1.124 [-1.386; -0.861] |
| No qualification                  | 1.870 [1.342; 2.397]       | 0.213 [-0.117; 0.544]   | 0.682 [0.482; 0.882]    |
| Year                              | -0.058 [-0.094; -0.022]    | -0.387 [-0.412; -0.363] | 0.197 [0.184; 0.211]    |
| Degree x Year                     | 0.030 [-0.007; 0.066]      | 0.054 [0.032; 0.077]    | -0.028 [-0.042; -0.015] |
| No qualification x Year           | -0.029 [-0.059; 0.001]     | -0.031 [-0.050; -0.013] | -0.041 [-0.052; -0.030] |
| Male (ref. Female)                | 0.137 [-0.051; 0.326]      | 2.176 [2.059; 2.294]    | -0.978 [-1.050; -0.906] |
| 30-49 years (ref. 16-29 years)    | 7.283 [6.974; 7.592]       | 9.264 [9.071; 9.457]    | 3.650 [3.533; 3.767]    |
| 50-64 years                       | 16.684 [16.380; 16.989]    | 8.485 [8.295; 8.675]    | 4.254 [4.139; 4.370]    |
| 65 years and older                | 24.241 [23.951; 24.530]    | 1.282 [1.102; 1.463]    | 2.278 [2.168; 2.388]    |
| $n$                               | 144703                     | 144703                  | 141791                  |
| $m$                               | 148                        | 148                     | 148                     |
| $\sigma_{strata}$                 | 2.45                       | 2.7                     | 0.86                    |
| $\sigma_{residual}$               | 18.19                      | 11.36                   | 6.85                    |
| <b>HSE</b>                        |                            |                         |                         |
| Intercept                         | 127.311 [126.765; 127.857] | 66.317 [65.970; 66.664] | 23.412 [23.305; 23.520] |
| Degree (ref. other qualification) | -1.010 [-1.432; -0.589]    | 1.108 [0.824; 1.393]    | -0.453 [-0.576; -0.329] |
| No qualification                  | 4.181 [3.876; 4.485]       | 2.984 [2.779; 3.190]    | 0.500 [0.411; 0.590]    |
| Year                              | -0.607 [-0.621; -0.592]    | -0.066 [-0.076; -0.057] | 0.086 [0.082; 0.090]    |
| Degree x Year                     | 0.004 [-0.022; 0.030]      | -0.059 [-0.077; -0.042] | -0.022 [-0.029; -0.014] |
| No qualification x Year           | -0.223 [-0.246; -0.201]    | -0.241 [-0.257; -0.226] | 0.008 [0.002; 0.015]    |
| Male (ref. Female)                | 5.060 [4.909; 5.210]       | 2.651 [2.549; 2.752]    | 0.372 [0.328; 0.417]    |
| 30-49 years (ref. 16-29 years)    | 3.025 [2.806; 3.245]       | 7.336 [7.188; 7.484]    | 2.186 [2.122; 2.251]    |
| 50-64 years                       | 13.124 [12.882; 13.366]    | 11.295 [11.132; 11.459] | 3.058 [2.987; 3.129]    |
| 65 years and older                | 21.836 [21.584; 22.088]    | 8.521 [8.350; 8.691]    | 2.519 [2.445; 2.594]    |
| $n$                               | 189552                     | 189552                  | 178475                  |
| $m$                               | 32                         | 32                      | 32                      |
| $\sigma_{strata}$                 | 1.36                       | 0.85                    | 0.21                    |
| $\sigma_{residual}$               | 16.53                      | 11.15                   | 4.73                    |
| <b>SHS</b>                        |                            |                         |                         |
| Intercept                         | 121.097 [119.719; 122.476] | 66.370 [65.458; 67.283] | 23.695 [23.314; 24.076] |
| Degree (ref. other qualification) | -0.748 [-2.159; 0.663]     | 0.355 [-0.574; 1.284]   | 0.160 [-0.280; 0.599]   |
| No qualification                  | 3.118 [1.864; 4.371]       | 0.389 [-0.437; 1.214]   | 0.762 [0.369; 1.154]    |
| Year                              | -0.246 [-0.309; -0.183]    | 0.045 [0.003; 0.086]    | 0.099 [0.082; 0.116]    |
| Degree x Year                     | 0.002 [-0.072; 0.077]      | -0.027 [-0.076; 0.022]  | -0.047 [-0.070; -0.024] |
| No qualification x Year           | -0.142 [-0.218; -0.066]    | -0.049 [-0.099; 0.001]  | -0.012 [-0.035; 0.012]  |
| Male (ref. Female)                | 4.842 [4.396; 5.288]       | 1.695 [1.402; 1.989]    | 0.036 [-0.103; 0.175]   |
| 30-49 years (ref. 16-29 years)    | 3.592 [2.871; 4.313]       | 6.281 [5.806; 6.755]    | 2.224 [2.000; 2.448]    |
| 50-64 years                       | 14.650 [13.900; 15.400]    | 9.935 [9.442; 10.429]   | 3.068 [2.835; 3.301]    |
| 65 years and older                | 23.235 [22.447; 24.023]    | 5.889 [5.370; 6.407]    | 2.656 [2.410; 2.901]    |
| $n$                               | 22511                      | 22511                   | 20833                   |
| $m$                               | 21                         | 21                      | 21                      |
| $\sigma_{strata}$                 | 1.07                       | 0.72                    | 0.22                    |
| $\sigma_{residual}$               | 16.9                       | 11.13                   | 5.08                    |

**Table 2b:** Linear mixed regressions by survey. Coefficients  $\beta$  and 99% confidence intervals.  $m$  and  $n$ : number of random-effect strata levels and sample size, respectively.  $\sigma$ : standard deviation of the random intercepts and residuals. HbA1c: glycated haemoglobin. CVD: cardiovascular disease. Log: logarithm.

| Variable                          | HbA1c                   | Cholesterol             | CVD risk <sub>log</sub> |
|-----------------------------------|-------------------------|-------------------------|-------------------------|
| <b>NAHNES</b>                     |                         |                         |                         |
| Intercept                         | 4.882 [4.837; 4.927]    | 4.962 [4.920; 5.005]    | -0.673 [-0.709; -0.637] |
| Degree (ref. other qualification) | -0.246 [-0.291; -0.201] | -0.069 [-0.112; -0.027] | -0.167 [-0.196; -0.138] |
| No qualification                  | 0.210 [0.176; 0.245]    | 0.107 [0.075; 0.140]    | 0.101 [0.079; 0.124]    |
| Year                              | 0.018 [0.015; 0.020]    | -0.021 [-0.023; -0.019] | -0.019 [-0.021; -0.017] |
| Degree x Year                     | 0.003 [0.001; 0.006]    | 0.003 [0.001; 0.006]    | 0.002 [0.000; 0.003]    |
| No qualification x Year           | -0.001 [-0.003; 0.001]  | -0.007 [-0.009; -0.006] | -0.002 [-0.003; -0.001] |
| Male (ref. Female)                | 0.093 [0.081; 0.106]    | -0.332 [-0.344; -0.321] | 0.742 [0.735; 0.749]    |
| 30-49 years (ref. 16-29 years)    | 0.463 [0.443; 0.483]    | 0.661 [0.642; 0.680]    | 1.905 [1.894; 1.917]    |
| 50-64 years                       | 0.990 [0.970; 1.010]    | 0.745 [0.726; 0.764]    | 2.990 [2.978; 3.001]    |
| 65 years and older                | 0.906 [0.887; 0.925]    | 0.437 [0.419; 0.455]    | 3.522 [3.511; 3.533]    |
| $n$                               | 138012                  | 136204                  | 127492                  |
| $m$                               | 148                     | 148                     | 148                     |
| $\sigma_{strata}$                 | 0.12                    | 0.11                    | 0.11                    |
| $\sigma_{residual}$               | 1.17                    | 1.09                    | 0.63                    |
| <b>HSE</b>                        |                         |                         |                         |
| Intercept                         | 3.824 [3.652; 3.995]    | 5.073 [5.039; 5.107]    | -0.326 [-0.351; -0.301] |
| Degree (ref. other qualification) | -0.006 [-0.045; 0.033]  | -0.011 [-0.052; 0.029]  | -0.068 [-0.103; -0.033] |
| No qualification                  | 0.054 [0.026; 0.082]    | 0.281 [0.253; 0.310]    | 0.285 [0.260; 0.309]    |
| Year                              | 0.047 [0.045; 0.049]    | -0.029 [-0.031; -0.028] | -0.012 [-0.013; -0.010] |
| Degree x Year                     | -0.004 [-0.006; -0.002] | 0.000 [-0.002; 0.002]   | -0.001 [-0.003; 0.001]  |
| No qualification x Year           | 0.005 [0.003; 0.006]    | -0.021 [-0.023; -0.019] | -0.008 [-0.010; -0.007] |
| Male (ref. Female)                | 0.082 [0.071; 0.093]    | -0.120 [-0.135; -0.106] | 0.906 [0.894; 0.917]    |
| 30-49 years (ref. 16-29 years)    | 0.183 [0.166; 0.201]    | 0.713 [0.691; 0.735]    | 1.398 [1.380; 1.416]    |
| 50-64 years                       | 0.469 [0.451; 0.488]    | 1.277 [1.253; 1.301]    | 2.457 [2.438; 2.477]    |
| 65 years and older                | 0.592 [0.573; 0.612]    | 1.138 [1.113; 1.164]    | 3.005 [2.985; 3.026]    |
| $n$                               | 66071                   | 88809                   | 39469                   |
| $m$                               | 31                      | 32                      | 31                      |
| $\sigma_{strata}$                 | 0.48                    | 0.06                    | 0.03                    |
| $\sigma_{residual}$               | 0.71                    | 1.09                    | 0.58                    |
| <b>SHS</b>                        |                         |                         |                         |
| Intercept                         | 4.257 [4.132; 4.381]    | 4.666 [4.539; 4.792]    | -0.207 [-0.343; -0.072] |
| Degree (ref. other qualification) | 0.210 [0.010; 0.411]    | 0.018 [-0.121; 0.158]   | 0.171 [-0.054; 0.397]   |
| No qualification                  | 0.244 [0.060; 0.429]    | 0.110 [-0.021; 0.241]   | 0.283 [0.077; 0.489]    |
| Year                              | 0.059 [0.051; 0.066]    | 0.002 [-0.005; 0.010]   | -0.005 [-0.013; 0.003]  |
| Degree x Year                     | -0.017 [-0.029; -0.004] | -0.000 [-0.011; 0.011]  | -0.014 [-0.028; 0.001]  |
| No qualification x Year           | -0.007 [-0.020; 0.005]  | -0.006 [-0.017; 0.005]  | -0.009 [-0.023; 0.005]  |
| Male (ref. Female)                | 0.029 [-0.003; 0.062]   | -0.117 [-0.158; -0.076] | 0.895 [0.859; 0.932]    |
| 30-49 years (ref. 16-29 years)    | 0.180 [0.124; 0.236]    | 0.753 [0.686; 0.820]    | 1.330 [1.266; 1.394]    |
| 50-64 years                       | 0.455 [0.396; 0.513]    | 1.375 [1.304; 1.446]    | 2.314 [2.248; 2.381]    |
| 65 years and older                | 0.641 [0.580; 0.703]    | 1.269 [1.191; 1.348]    | 2.903 [2.831; 2.974]    |
| $n$                               | 7168                    | 10781                   | 3723                    |
| $m$                               | 21                      | 21                      | 21                      |
| $\sigma_{strata}$                 | 0.02                    | 0.07                    | 0.02                    |
| $\sigma_{residual}$               | 0.69                    | 1.08                    | 0.56                    |

**Table 3a:** Linear mixed regression models with the pooled dataset. Coefficients  $\beta$  and 99% confidence intervals.  $m$  and  $n$ : number of random-effect strata levels and sample size, respectively.  $\sigma$ : standard deviation of the random intercepts and residuals. SBP, DBP: systolic and diastolic blood pressure. BMI: body-mass-index

| Variable                          | SBP                        | DBP                     | BMI                     |
|-----------------------------------|----------------------------|-------------------------|-------------------------|
| Intercept                         | 121.650 [120.998; 122.302] | 63.852 [63.509; 64.194] | 25.482 [25.329; 25.635] |
| Degree (ref. other qualification) | -1.450 [-1.804; -1.096]    | 0.586 [0.353; 0.818]    | -0.549 [-0.669; -0.430] |
| No qualification                  | 2.788 [2.529; 3.047]       | 3.050 [2.880; 3.220]    | 0.591 [0.504; 0.679]    |
| Year                              | -0.557 [-0.571; -0.544]    | -0.090 [-0.099; -0.081] | 0.110 [0.106; 0.115]    |
| Degree x Year                     | -0.009 [-0.029; 0.011]     | -0.022 [-0.036; -0.009] | -0.038 [-0.045; -0.031] |
| No qualification x Year           | -0.106 [-0.122; -0.089]    | -0.179 [-0.190; -0.168] | -0.017 [-0.022; -0.011] |
| Male (ref. Female)                | 3.031 [2.917; 3.146]       | 2.357 [2.282; 2.432]    | -0.222 [-0.261; -0.183] |
| 30-49 years (ref. 16-29 years)    | 4.612 [4.437; 4.788]       | 7.703 [7.588; 7.818]    | 2.713 [2.654; 2.772]    |
| 50-64 years                       | 14.721 [14.536; 14.905]    | 10.018 [9.897; 10.139]  | 3.573 [3.511; 3.635]    |
| 65 years and older                | 22.822 [22.639; 23.005]    | 4.815 [4.695; 4.935]    | 2.345 [2.283; 2.407]    |
| HSE (ref. NHANES)                 | 5.063 [3.649; 6.477]       | 3.771 [3.068; 4.473]    | -2.245 [-2.542; -1.949] |
| SHS                               | 5.837 [4.134; 7.540]       | 4.235 [3.385; 5.085]    | -1.869 [-2.230; -1.508] |
| $n$                               | 356766                     | 356766                  | 341099                  |
| $m$                               | 201                        | 201                     | 201                     |
| $\sigma_{strata}$                 | 3.67                       | 1.81                    | 0.76                    |
| $\sigma_{residual}$               | 17.34                      | 11.38                   | 5.75                    |

**Table 3b:** Linear mixed regressions with the pooled dataset. Coefficients  $\beta$  and 99% confidence intervals.  $m$  and  $n$ : number of random-effect strata levels and sample size, respectively.  $\sigma$ : standard deviation of the random intercepts and residuals. HbA1c: glycated haemoglobin. CVD: cardiovascular disease. Log: logarithm.

| Variable                          | HbA1c                   | Cholesterol             | CVD risk <sub>log</sub> |
|-----------------------------------|-------------------------|-------------------------|-------------------------|
| Intercept                         | 4.716 [4.663; 4.769]    | 4.849 [4.822; 4.876]    | -0.658 [-0.683; -0.633] |
| Degree (ref. other qualification) | -0.171 [-0.203; -0.138] | -0.033 [-0.062; -0.005] | -0.127 [-0.150; -0.104] |
| No qualification                  | 0.160 [0.136; 0.185]    | 0.268 [0.247; 0.289]    | 0.136 [0.119; 0.152]    |
| Year                              | 0.033 [0.032; 0.035]    | -0.026 [-0.027; -0.025] | -0.015 [-0.016; -0.014] |
| Degree x Year                     | 0.002 [-0.000; 0.003]   | 0.001 [-0.001; 0.003]   | 0.000 [-0.001; 0.001]   |
| No qualification x Year           | 0.000 [-0.001; 0.002]   | -0.015 [-0.017; -0.014] | -0.004 [-0.005; -0.003] |
| Male (ref. Female)                | 0.090 [0.081; 0.098]    | -0.248 [-0.257; -0.239] | 0.783 [0.777; 0.789]    |
| 30-49 years (ref. 16-29 years)    | 0.381 [0.366; 0.395]    | 0.644 [0.630; 0.659]    | 1.778 [1.768; 1.788]    |
| 50-64 years                       | 0.808 [0.793; 0.823]    | 0.967 [0.953; 0.982]    | 2.863 [2.853; 2.873]    |
| 65 years and older                | 0.799 [0.785; 0.813]    | 0.685 [0.670; 0.699]    | 3.406 [3.397; 3.416]    |
| HSE (ref. NHANES)                 | -0.911 [-1.017; -0.805] | 0.432 [0.392; 0.472]    | 0.139 [0.103; 0.174]    |
| SHS                               | -0.277 [-0.406; -0.148] | 0.537 [0.482; 0.592]    | 0.252 [0.204; 0.300]    |
| $n$                               | 211251                  | 235794                  | 170684                  |
| $m$                               | 200                     | 201                     | 200                     |
| $\sigma_{strata}$                 | 0.27                    | 0.1                     | 0.09                    |
| $\sigma_{residual}$               | 1.03                    | 1.1                     | 0.62                    |
